# Supplementary material for: WITHDRAWN: Monkeypox viruses circulate in distantly-related small mammal species in the Democratic Republic of the Congo
Source: Research Square preprint supplement (doi:10.21203/rs.3.rs-414280/v1), 2021-04-16
Supplement: Supplementary file 1 [file 202184db723f088babb9766b.xlsx]

## Sheet: Sheet1
ID	Year	Location	Species	Order
CRT771	2010	BOMANE	Petrodromus tetradactylus	Chiroptera
CRT-1806	2010	YAEKELA	Myonycteris torquata	Chiroptera
CRT-1808	2010	YAEKELA	Myonycteris torquata	Chiroptera
CRT-1832	2010	YAEKELA	Epomops franqueti	Chiroptera
CRT-1848	2010	YAEKELA	Myonycteris torquata	Chiroptera
CRT-1853	2010	YAEKELA	Myonycteris torquata	Chiroptera
CRT-1912	2010	KONA	Megaloglossus woermanni	Chiroptera
CRT-1917	2010	KONA	Epomops franqueti	Chiroptera
CRT-1929	2010	KONA	Epomops franqueti	Chiroptera
CRT-1947	2010	KONA	Myonycteris torquata	Chiroptera
CRT-2002	2010	KONA	Megaloglossus woermanni	Chiroptera
CRT-2011	2010	KONA	Epomops franqueti	Chiroptera
CRT-2014	2010	KONA	Epomops franqueti	Chiroptera
CRT-2035	2010	LIEKI	Myonycteris torquata	Chiroptera
CRT-2036	2010	LIEKI	Epomops franqueti	Chiroptera
CRT-2051	2010	KONA	Myonycteris torquata	Chiroptera
CRT-2055	2010	BOMANE	Megaloglossus woermanni	Chiroptera
CRT-2063	2010	BOMANE	Epomops franqueti	Chiroptera
CRT-2078	2010	BOMANE	Myonycteris torquata	Chiroptera
CRT-2132	2010	BOMANE	Epomops franqueti	Chiroptera
CRT-2133	2010	BOMANE	Epomops franqueti	Chiroptera
CRT-2195	2010	BOMANE	Myonycteris torquata	Chiroptera
CRT-2196	2010	BOMANE	Myonycteris torquata	Chiroptera
CRT-2200	2010	BOMANE	Myonycteris torquata	Chiroptera
CRT-2282	2010	LIEKI	Myonycteris torquata	Chiroptera
CRT-2285	2010	LIEKI	Myonycteris torquata	Chiroptera
CRT-2287	2010	LIEKI	Myonycteris torquata	Chiroptera
CRT-2291	2010	LIEKI	Myonycteris torquata	Chiroptera
CRT-2296	2010	LIEKI	Myonycteris torquata	Chiroptera
CRT-2374	2010	YAEKELA	Epomops franqueti	Chiroptera
CRT-2395	2010	YAEKELA	Epomops franqueti	Chiroptera
CRT-2397	2010	YAEKELA	Myonycteris torquata	Chiroptera
CRT-2398	2010	YAEKELA	Myonycteris torquata	Chiroptera
TLL378	2013	TLL-Tshuapa-Lomami-Lualaba	Epomops franqueti	Chiroptera
TLL381	2013	TLL-Tshuapa-Lomami-Lualaba	Megaloglossus woermanni	Chiroptera
TLL386	2013	TLL-Tshuapa-Lomami-Lualaba	Hipposideros caffer	Chiroptera
TLL387	2013	TLL-Tshuapa-Lomami-Lualaba	Hipposideros caffer	Chiroptera
TLL389	2013	TLL-Tshuapa-Lomami-Lualaba	Hipposideros caffer	Chiroptera
UM001	2012	UMA	Epomops franqueti	Chiroptera
UM004	2012	UMA	Epomops franqueti	Chiroptera
UM015	2012	UMA	Epomops franqueti	Chiroptera
UMA-503	2014	UMA	Hipposideros caffer	Chiroptera
UMA-544	2014	UMA	Megaloglossus woermanni	Chiroptera
UMA-622	2014	UMA	Hipposideros ruber	Chiroptera
UMA-624	2014	UMA	Myonycteris torquata	Chiroptera
UMA-625	2014	UMA	Hipposideros ruber	Chiroptera
UMA-635	2014	UMA	Myonycteris torquata	Chiroptera
YK001CH	2012	YOKO FOREST RESERVE	Megaloglossus woermanni	Chiroptera
YK005CH	2012	YOKO FOREST RESERVE	Myonycteris torquata	Chiroptera
YK008CH	2012	YOKO FOREST RESERVE	Epomops franqueti	Chiroptera
YK013CH	2012	YOKO FOREST RESERVE	Myonycteris torquata	Chiroptera
YK019CH	2012	YOKO FOREST RESERVE	Myonycteris torquata	Chiroptera
YK027CH	2012	YOKO FOREST RESERVE	Epomops franqueti	Chiroptera
YK033CH	2012	YOKO FOREST RESERVE	Epomops franqueti	Chiroptera
YK039CH	2012	YOKO FOREST RESERVE	Myonycteris torquata	Chiroptera
YK041CH	2012	YOKO FOREST RESERVE	Megaloglossus woermanni	Chiroptera
YKX48	2014	HEMBE	Eidolon helvum	Chiroptera
COB1779	2016	Yangambi	Hipposideros beatus	Chiroptera
COB1810	2016	Yangambi	Eidolon helvum	Chiroptera
COB1736	2016	Yangambi	Megaloglossus woermanni	Chiroptera
COB1719	2016	Yangambi	Myonycteris torquata	Chiroptera
COB1736	2016	Yangambi	Megaloglossus woermanni	Chiroptera
COB1772	2016	Yangambi	Megaloglossus woermanni	Chiroptera
COB1779	2016	Yangambi	Hipposideros beatus	Chiroptera
COB1788	2016	Yangambi	Megaloglossus woermanni	Chiroptera
COB1810	2016	Yangambi	Eidolon helvum	Chiroptera
COB2	2013	Yangambi	Suncus cf. remyi	Eulipotyphla
COB10	2013	Yangambi	Crocidura cf. ludia	Eulipotyphla
COB14	2013	Yangambi	Crocidura cf. denti	Eulipotyphla
COB19	2013	Yangambi	Crocidura cf. denti	Eulipotyphla
COB26	2013	Yangambi	Crocidura littoralis sp2	Eulipotyphla
COB35	2013	Yangambi	Crocidura cf. denti	Eulipotyphla
COB37	2013	Yangambi	Crocidura cf. denti	Eulipotyphla
COB49	2013	Yangambi	Crocidura littoralis sp2	Eulipotyphla
COB50	2013	Yangambi	Crocidura caliginea	Eulipotyphla
COB51	2013	Yangambi	Crocidura caliginea	Eulipotyphla
COB52	2013	Yangambi	Crocidura cf. denti	Eulipotyphla
COB53	2013	Yangambi	Crocidura littoralis sp2	Eulipotyphla
COB54	2013	Yangambi	Crocidura cf. olivieri	Eulipotyphla
COB73	2013	Yangambi	Crocidura dolichura	Eulipotyphla
COB75	2013	Yangambi	Suncus cf. remyi	Eulipotyphla
COB84	2013	Yangambi	Sylvisorex akaibei	Eulipotyphla
COB101	2013	Yangambi	Crocidura caliginea	Eulipotyphla
COB135	2013	Yangambi	Crocidura caliginea	Eulipotyphla
COB136	2013	Yangambi	Crocidura littoralis sp2	Eulipotyphla
COB138	2013	Yangambi	Crocidura cf. denti	Eulipotyphla
COB140	2013	Yangambi	Crocidura littoralis sp2	Eulipotyphla
COB144	2013	Yangambi	Crocidura littoralis sp2	Eulipotyphla
COB150	2013	Yangambi	Sylvisorex akaibei	Eulipotyphla
COB155	2013	Yangambi	Crocidura littoralis sp2	Eulipotyphla
COB161	2013	Yangambi	Crocidura littoralis sp2	Eulipotyphla
COB165	2013	Yangambi	Paracrocidura schoutedeni	Eulipotyphla
COB173	2013	Yangambi	Crocidura littoralis sp2	Eulipotyphla
COB174	2013	Yangambi	Crocidura caliginea	Eulipotyphla
COB175	2013	Yangambi	Crocidura caliginea	Eulipotyphla
COB182	2013	Yangambi	Suncus cf. remyi	Eulipotyphla
COB187	2013	Yangambi	Crocidura cf. denti	Eulipotyphla
COB189	2013	Yangambi	Crocidura dolichura	Eulipotyphla
COB200	2013	Yangambi	Crocidura caliginea	Eulipotyphla
COB223	2013	Yangambi	Crocidura cf. denti	Eulipotyphla
COB235	2013	Yangambi	Crocidura caliginea	Eulipotyphla
COB246	2013	Yangambi	Crocidura cf. olivieri	Eulipotyphla
COB253	2013	Yangambi	Crocidura cf. denti	Eulipotyphla
COB254	2013	Yangambi	Crocidura caliginea	Eulipotyphla
COB263	2013	Yangambi	Crocidura littoralis sp2	Eulipotyphla
COB264	2013	Yangambi	Sylvisorex akaibei	Eulipotyphla
COB771	2014	Yangambi	Crocidura littoralis sp.2	Eulipotyphla
COB843	2014	Yangambi	Sylvisorex akaibei	Eulipotyphla
COB886	2014	Yangambi	Crocidura littoralis sp2	Eulipotyphla
COB910	2014	Yangambi	Crocidura caliginea	Eulipotyphla
COB963	2014	Yangambi	Crocidura littoralis sp2	Eulipotyphla
COB974	2014	Yangambi	Crocidura littoralis sp2	Eulipotyphla
COB1051	2015	Yangambi	Sylvisorex cf. johnstoni	Eulipotyphla
COB1099	2015	Yangambi	Crocidura caliginea	Eulipotyphla
COB1175	2015	Yangambi	Crocidura littoralis sp2	Eulipotyphla
YKX22	2014	LOSANDO FOREST	Cricetomys emini	Eulipotyphla
COB 1196	2016	Yangambi	Crocidura cf. denti	Eulipotyphla
COB 1212	2016	Yangambi	Crocidura cf. olivieri	Eulipotyphla
COB 1214	2016	Yangambi	Crocidura	Eulipotyphla
COB 1215	2016	Yangambi	Crocidura cf. denti	Eulipotyphla
COB 1217	2016	Yangambi	Crocidura cf. denti	Eulipotyphla
COB 1220	2016	Yangambi	Crocidura ludia	Eulipotyphla
COB 1224	2016	Yangambi	Crocidura cf. denti	Eulipotyphla
COB 1226	2016	Yangambi	Crocidura cf. denti	Eulipotyphla
COB 1234	2016	Yangambi	Crocidura littoralis sp2	Eulipotyphla
COB 1239	2016	Yangambi	Crocidura littoralis sp2	Eulipotyphla
COB 1244	2016	Yangambi	Scutisorex sp3	Eulipotyphla
COB 1246	2016	Yangambi	Crocidura cf. denti	Eulipotyphla
COB 1253	2016	Yangambi	Suncus cf. remyi	Eulipotyphla
COB 1262	2016	Yangambi	Crocidura cf. denti	Eulipotyphla
COB 1263	2016	Yangambi	Crocidura cf. denti	Eulipotyphla
COB 1276	2016	Yangambi	Crocidura cf. olivieri	Eulipotyphla
COB 1277	2016	Yangambi	Crocidura cf. denti	Eulipotyphla
COB 1282	2016	Yangambi	Crocidura cf. denti	Eulipotyphla
COB 1284	2016	Yangambi	Crocidura cf. denti	Eulipotyphla
COB 1285	2016	Yangambi	Crocidura caliginea	Eulipotyphla
COB 1292	2016	Yangambi	Crocidura cf. denti	Eulipotyphla
COB 1293	2016	Yangambi	Crocidura cf. denti	Eulipotyphla
COB 1304	2016	Yangambi	Crocidura cf. denti	Eulipotyphla
COB 1342	2016	Yangambi	Crocidura littoralis sp2	Eulipotyphla
COB 1355	2016	Yangambi	Crocidura cf. olivieri	Eulipotyphla
COB 1357	2016	Yangambi	Crocidura cf. olivieri	Eulipotyphla
COB 1358	2016	Yangambi	Crocidura cf. olivieri	Eulipotyphla
COB 1371	2016	Yangambi	Crocidura littoralis sp2	Eulipotyphla
COB 1378	2016	Yangambi	Crocidura cf. denti	Eulipotyphla
COB1274	2016	Yangambi	Crocidura littoralis sp2	Eulipotyphla
COB1291	2016	Yangambi	Crocidura littoralis sp2	Eulipotyphla
COB1301	2016	Yangambi	Crocidura denti	Eulipotyphla
COB1302	2016	Yangambi	Crocidura caliginea	Eulipotyphla
COB1305	2016	Yangambi	Crocidura olivieri	Eulipotyphla
COB1308	2016	Yangambi	Crocidura ludia	Eulipotyphla
COB1309	2016	Yangambi	Crocidura denti	Eulipotyphla
COB1310	2016	Yangambi	Crocidura ludia	Eulipotyphla
COB1315	2016	Yangambi	Crocidura caliginea	Eulipotyphla
COB1333	2016	Yangambi	Crocidura ludia	Eulipotyphla
COB1334	2016	Yangambi	Sylvisorex akaibei	Eulipotyphla
COB1352	2016	Yangambi	Crocidura olivieri	Eulipotyphla
COB1359	2016	Yangambi	Crocidura denti	Eulipotyphla
COB1360	2016	Yangambi	Crocidura littoralis sp2	Eulipotyphla
COB1366	2016	Yangambi	Crocidura olivieri	Eulipotyphla
COB8	2013	Yangambi	Lophuromys dudui	Rodentia
COB68	2013	Yangambi	Lophuromys luteogaster	Rodentia
COB72	2013	Yangambi	Lophuromys luteogaster	Rodentia
COB127	2013	Yangambi	Hybomys cf. lunaris	Rodentia
COB148	2013	Yangambi	Lophuromys dudui	Rodentia
COB149	2013	Yangambi	Praomys cf. jacksoni	Rodentia
COB159	2013	Yangambi	Hybomys cf. lunaris	Rodentia
COB169	2013	Yangambi	Praomys cf. jacksoni	Rodentia
COB170	2013	Yangambi	Praomys cf. jacksoni	Rodentia
COB172	2013	Yangambi	Praomys misonnei	Rodentia
COB183	2013	Yangambi	Hylomyscus stella	Rodentia
COB205	2013	Yangambi	Nannomys cf. grata	Rodentia
COB212	2013	Yangambi	Hylomyscus stella	Rodentia
COB226	2013	Yangambi	Praomys cf. jacksoni	Rodentia
COB233	2013	Yangambi	Praomys cf. jacksoni	Rodentia
COB251	2013	Yangambi	Lophuromys dudui	Rodentia
COB262	2013	Yangambi	Lophuromys dudui	Rodentia
COB267	2013	Yangambi	Praomys cf. jacksoni	Rodentia
COB773	2014	Yangambi	Hylomyscus stella	Rodentia
COB793	2014	Yangambi	Nannomys cf. grata	Rodentia
COB841	2014	Yangambi	Lophuromys dudui	Rodentia
COB847	2014	Yangambi	Praomys cf. jacksoni	Rodentia
COB870	2014	Yangambi	Praomys cf. jacksoni	Rodentia
COB898	2014	Yangambi	Lophuromys luteogaster	Rodentia
COB927	2014	Yangambi	Nannomys cf. grata	Rodentia
COB928	2014	Yangambi	Nannomys cf. grata	Rodentia
COB1020	2014	Yangambi	Hylomyscus stella	Rodentia
COB1021	2014	Yangambi	Praomys mutoni	Rodentia
COB1028	2014	Yangambi	Praomys misonnei	Rodentia
COB1030	2014	Yangambi	Lophuromys luteogaster	Rodentia
COB1034	2014	Yangambi	Hylomyscus stella	Rodentia
COB1036	2014	Yangambi	Hylomyscus stella	Rodentia
COB1057	2015	Yangambi	Hylomyscus stella	Rodentia
COB1064	2015	Yangambi	Praomys cf. jacksoni	Rodentia
COB1065	2015	Yangambi	Praomys misonnei	Rodentia
COB1088	2015	Yangambi	Nannomys cf. grata	Rodentia
COB1101	2015	Yangambi	Praomys cf. jacksoni	Rodentia
COB1103	2015	Yangambi	Nannomys cf. grata	Rodentia
CRT-241	2010	KONA	Protoxerus stagneri	Rodentia
TLL10	2013	TLL-Tshuapa-Lomami-Lualaba	Hybomys univitattus	Rodentia
TLL55	2013	TLL-Tshuapa-Lomami-Lualaba	Stochomys longicaudatus	Rodentia
UMA-018	2014	UMA	squirrel seq. NO GENBANK REF	Rodentia
UMA-028	2014	UMA	squirrel seq. NO GENBANK REF	Rodentia
UMA-030	2014	UMA	squirrel seq. NO GENBANK REF	Rodentia
UMA-387	2014	UMA	squirrel seq. NO GENBANK REF	Rodentia
UMA-510	2014	UMA	squirrel seq. NO GENBANK REF	Rodentia
Y005	2014	YOKO FOREST RESERVE	Malacomys longipes	Rodentia
Y006	2014	YOKO FOREST RESERVE	squirrel seq. NO GENBANK REF	Rodentia
Y033	2014	YOKO FOREST RESERVE	squirrel seq. NO GENBANK REF	Rodentia
Y045	2014	YOKO FOREST RESERVE	squirrel seq. NO GENBANK REF	Rodentia
Y057	2014	YOKO FOREST RESERVE	squirrel seq. NO GENBANK REF	Rodentia
Y070	2014	YOKO FOREST RESERVE	squirrel seq. NO GENBANK REF	Rodentia
Y074	2014	YOKO FOREST RESERVE	squirrel seq. NO GENBANK REF	Rodentia
Y077	2014	YOKO FOREST RESERVE	squirrel seq. NO GENBANK REF	Rodentia
Y079	2014	YOKO FOREST RESERVE	Stochomys longicaudatus	Rodentia
Y081	2014	YOKO FOREST RESERVE	squirrel seq. NO GENBANK REF	Rodentia
Y082	2014	YOKO FOREST RESERVE	squirrel seq. NO GENBANK REF	Rodentia
Y095	2014	YOKO FOREST RESERVE	Praomys mutoni	Rodentia
Y102	2014	YOKO FOREST RESERVE	Stochomys longicaudatus	Rodentia
Y108	2014	YOKO FOREST RESERVE	Stochomys longicaudatus	Rodentia
Y110	2014	YOKO FOREST RESERVE	squirrel seq. NO GENBANK REF	Rodentia
Y115	2014	YOKO FOREST RESERVE	squirrel seq. NO GENBANK REF	Rodentia
Y120	2014	YOKO FOREST RESERVE	squirrel seq. NO GENBANK REF	Rodentia
Y121	2014	YOKO FOREST RESERVE	squirrel seq. NO GENBANK REF	Rodentia
YK012	2014	YOKO FOREST RESERVE	squirrel seq. NO GENBANK REF	Rodentia
YK054	2015	YOKO FOREST RESERVE	squirrel seq. NO GENBANK REF	Rodentia
YK061	2015	YOKO FOREST RESERVE	squirrel seq. NO GENBANK REF	Rodentia
YKX19	2014	MAKILA FOREST	Cricetomys sp2	Rodentia
YKX41	2014	YAFOLI	Funisciurus anerythrus	Rodentia
COB 1205	2016	Yangambi	Praomys cf. jacksoni	Rodentia
COB 1248	2016	Yangambi	Praomys cf. jacksoni	Rodentia
COB 1265	2016	Yangambi	Hylomyscus stella	Rodentia
COB 1275	2016	Yangambi	Nannomys cf. grata	Rodentia
COB 1317	2016	Yangambi	Hylomyscus aeta	Rodentia
COB 1318	2016	Yangambi	Praomys cf. jacksoni	Rodentia
COB 1319	2016	Yangambi	Stochomys longicaudatus	Rodentia
COB 1340	2016	Yangambi	Nannomys cf. grata	Rodentia
COB 1349	2016	Yangambi	Nannomys cf. grata	Rodentia
COB 1362	2016	Yangambi	Nannomys cf. grata	Rodentia
COB 1372	2016	Yangambi	Nannomys cf. grata	Rodentia
COB1767	2016	Yangambi	Funisciurus pyrropus	Rodentia
COB1786	2016	Yangambi	Paraxerus boehmi	Rodentia
COB1781	2016	Yangambi	Funisciurus pyrropus	Rodentia
COB1786	2016	Yangambi	Paraxerus boehmi	Rodentia
COB1316	2016	Yangambi	Praomys cf. jacksoni	Rodentia
COB1336	2016	Yangambi	Praomys cf. jacksoni	Rodentia
COB1337	2016	Yangambi	Praomys cf. jacksoni	Rodentia
COB1338	2016	Yangambi	Crocidura olivieri	Rodentia
COB1339	2016	Yangambi	Praomys cf. jacksoni	Rodentia
COB1344	2016	Yangambi	Praomys cf. jacksoni	Rodentia
COB1347	2016	Yangambi	Praomys cf. jacksoni	Rodentia
COB1351	2016	Yangambi	Nannomys cf. grata	Rodentia
COB1369	2016	Yangambi	Nannomys cf. grata	Rodentia
COB1377	2016	Yangambi	Nannomys cf. grata	Rodentia
EPU30	2012	RFO-EPULU	Malacomys longipes	Rodentia
